# Supplementary material
Source: PubMed Central journal article supplement (PMC6815880)
Supplement: NIHMS1055695-supplement-Supplemental_Material.pdf [file NIHMS1055695-supplement-Supplemental_Material.pdf]

## Supplemental Material

### Tributyltin induces a transcriptional response without a brite adipocyte signature in adipocyte models

Stephanie Kim<sup>1,3</sup>, Amy Li<sup>2,3</sup>, Stefano Monti<sup>2,3</sup>, Jennifer J. Schlezinger<sup>1,3</sup>

<sup>1</sup>Department of Environmental Health, Boston University, Boston, MA, USA

<sup>2</sup>Computational Biomedicine, Boston University, Boston, MA USA

<sup>3</sup>Superfund Research Program, Boston University, Boston, MA USA

\*Corresponding Author: [jschlezi@bu.edu](mailto:jschlezi@bu.edu)

#### Table of Contents

Page 2: Table S1 – Mouse primer sequences for reverse transcriptase-qPCR

Page 3: Table S2 – Curated genesets related to brite adipogenesis (A) and mitochondrial biogenesis and osteogenesis (B).

Page 4: Figure S1 – Differential expression of nuclear receptors by Day 4 of differentiation of BM-MSCs.

Page 5: Figure S2 – Differential expression of nuclear receptor coregulators by Day 4 of differentiation between Rosi- and TBT-treated BM-MSCs.

Page 6: Figure S3 – GSEA plots of enriched osteogenic genes in TBT-, LG100268-, and rosiglitazone-treated BM-MSCs.

Page 7: Figure S4 – Heatmap of top Gene Ontology (GO) terms enriched for each chemical **(Attached as Excel File)**

Page 8: Figure S5 – GSEA plots of rosiglitazone- versus TBT- enriched metabolism- and mitochondria-related gene sets in BM-MSCs (A) and 3T3 L1 cells (B).

Page 9: Figure S6 – 3T3 L1 cells cultured with LG268, Rosi and TBT during differentiation.

Page 10: References

**Table S1. Mouse primer sequences for reverse transcriptase qPCR.**

| <b>GENE SYMBOL</b> | <b>FORWARD</b>           | <b>REVERSE</b>            |
|--------------------|--------------------------|---------------------------|
| <i>Rn18s</i>       | GTAACCCGTTGAACCCATT      | CCATCCAATCGGTAGTAGCG      |
| <i>B2m</i>         | CTGCTACGTAACACAGTTCCACCC | CATGATGCTTGATCACATGTCTCG  |
| <i>Cidea</i>       | TGCTCTTCTGTATCGCCCAGT    | GCCGTGTTAAGGAATCTGCTG     |
| <i>Elvol3</i>      | TCCGCGTTCTCATGTAGGTCT    | GGACCTGATGCAACCCTATGA     |
| <i>Fabp4</i>       | AGCCCAACATGATCATCAGC     | TTTCCATCCCACCTTCTGCAC     |
| <i>Plin1</i>       | GGGACCTGTGAGTGCTTCC      | GTATTGAAGAGCCGGGATCTTTT   |
| <i>Ppara</i>       | GCGTACGGCAATGGCTTTAT     | GAACGGCTTCCTCAGGTTCTT     |
| <i>Pparg</i>       | TGGGTGAAACTCTGGGAGATTC   | AATTTCTTGTGAAGTGCTCATAGGC |
| <i>Ucp1</i>        | CTCAGTGGGAGCGACTCTTCA    | GGCCTCTGTGGTACACGACAA     |
| <i>Scd1</i>        | CCTCCTGCAAGCTCTACACC     | CAGCCGAGCCTTGTAAGTTC      |

**Table S2 – Curated genesets related to brite adipogenesis and mitochondrial biogenesis (A) and osteogenesis (B).** The table displays the genes used for each curated pathway related to mitochondrial biogenesis or brite fat differentiation and osteogenesis (Accomando et al. 2014; Calderon-Dominguez et al. 2016; Gburcik et al. 2012; Harms and Seale 2013; Hilton et al. 2015; Kajimura et al. 2008; Krings et al. 2012; Lo and Sun 2013; Murholm et al. 2009; Rosell et al. 2014; Spoto et al. 2014; Wang et al. 2007) and osteogenesis (Cappellen et al. 2002; Ji et al. 2000; Saeed and Iqtedar 2015; Schilling et al. 2005; Xiao et al. 2010, 2011; Yao et al. 2008) based on literature review.

| <b>Curated Gene Sets</b>                                   |                                                                                                                                                                                                                                                                                  |
|------------------------------------------------------------|----------------------------------------------------------------------------------------------------------------------------------------------------------------------------------------------------------------------------------------------------------------------------------|
| <b>(a) Brite Adipogenesis and Mitochondrial Biogenesis</b> | <b>Genes</b>                                                                                                                                                                                                                                                                     |
| <b>Mitochondria</b>                                        | Bckdha, Cabc1, Chchdh10, Coq3, Coq5, Coq9, Cox7a1, Cox8b, Crat, Cyc1, Decr1, Etfdh, Hsha, Idh3a, Letm1, Letmd1, Me3, Plat, Rilp, Sirt3, Ucp1, Uqcr10, Uqcrcf1, Adck3, Cs, Ndufa5, Sdhd, Atp5h, Uqcrc1                                                                            |
| <b>Metabolism</b>                                          | Acaa2, Acads, Acadvl, Acc, Acot11, Acot4, Acsf2, Cacb, Coasy, Cyp2b10, Fbp2, Fn3k, Gk, Ldhd, Pank1, Pck1, Pdhb, Pdhx, Pdk2, Pdk4, Pfkfb3, Sod2, Acadl, Acox1, Cd36, Acs11, Crat, Slc25a20, Acaa1, Gk, Gpd1, Pnpla2, Mgst3, Gsta4, Cbr3, Ptgs2, Nsdhl, Pdha1                      |
| <b>Hormone or Vitamin</b>                                  | Cyp2b10, Dio2, Retsat, Rdn16, Irs1, Fgf21, Nrg4, Cnp                                                                                                                                                                                                                             |
| <b>Immune or Inflammatory-Related</b>                      | C8g, Ifnar2, Igsf21, Il15ra, Kng1, Serpina12, Lgals3, Il2, Il4, Il10, Il13, Socs3, Cd163, Adipoq                                                                                                                                                                                 |
| <b>Transcription Factors and Coregulators</b>              | Cebpa, Ebf2, Foxc2, Pparg, Prdm16, Tbx15, Ppargc1a, Sirt1, Ppara, Ppard, Ppargc1b, Sirt3, Ncoa1                                                                                                                                                                                  |
| <b>Pro-Browning</b>                                        | Cpt1a, Cpt1b, Gata2, Gata3, Klf2, Klf3, Bmp7, Creb1, Dio2, Insr, Mapk14, Nrf1, Wnt5a, Bmp8b, Ptgs2, Elovl3, Slc27a2, Slc27a1, Hoxc9, Shox2, Hoxc8, Hoxc4, Hoxa5, Tfb2m, Ctbp1, Ctbp2, Cidec, Cidea, Tmem26                                                                       |
| <b>(b) Osteogenesis</b>                                    | Alpl, Col1a1, Fgf23, Bglap2, Spp1, Postn, Sparc, Bglap, Nfatc1, Ctsk, Tnfsf11, Cybb, Pdgfb, Itgb3, Calcr, Tnfrsf11a, Acp5, Calcr, Mitf, Car2, Mmp9, Sp7, Bmp4, Fos, Ubd, Mmp13, Runx2, Col1a2, Col2a1, Col11a1, Ibsp, Pdgfa, Itgb1, Smad3, Dmp1, Fgfr2, Tgfb1, Smad1, Mafb, Apoe |

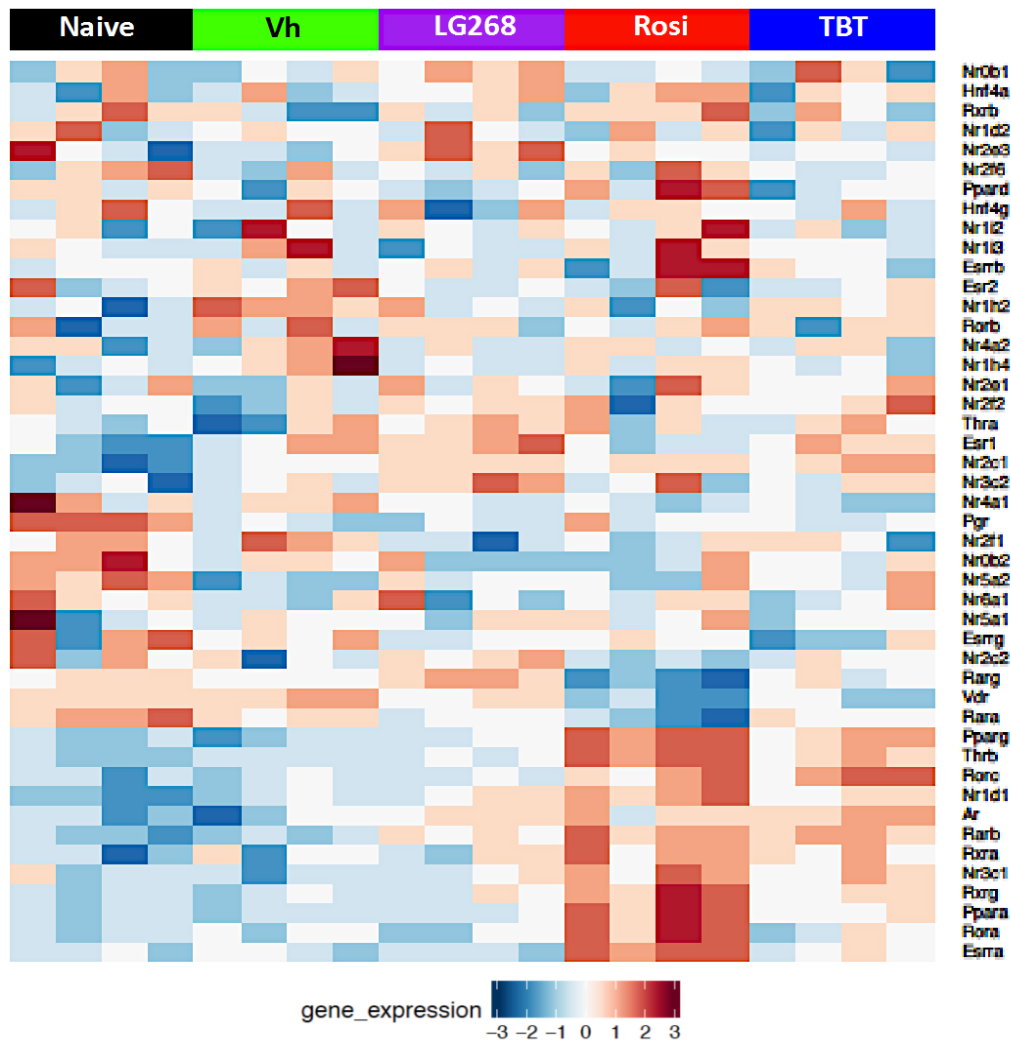

**Figure S1 – Differential expression of nuclear receptors by Day 4 of differentiation of BM-MSCs.** Primary bone marrow cells were isolated from female, 8 week old, C57BL/6J mice, plated, and allowed to adhere for 7 days. The medium was replaced with basal medium supplemented with osteogenic additives,  $\beta$ -glycerol phosphate, ascorbate, insulin and dexamethasone. Cultures were treated with Vh (DMSO, 0.1%), rosiglitazone (Rosi, 100 nM), LG100268 (LG268, 100 nM) or TBT (80 nM), cultured for 4 days and analyzed for mRNA expression using microarray. The heatmap displays the significant differentially expressed nuclear receptors ( $fdr < 0.05$ ) of 47 identified mouse nuclear receptors from NURSA between the vehicle and chemical-treated BM-MSCs compared to naïve BM-MSCs.

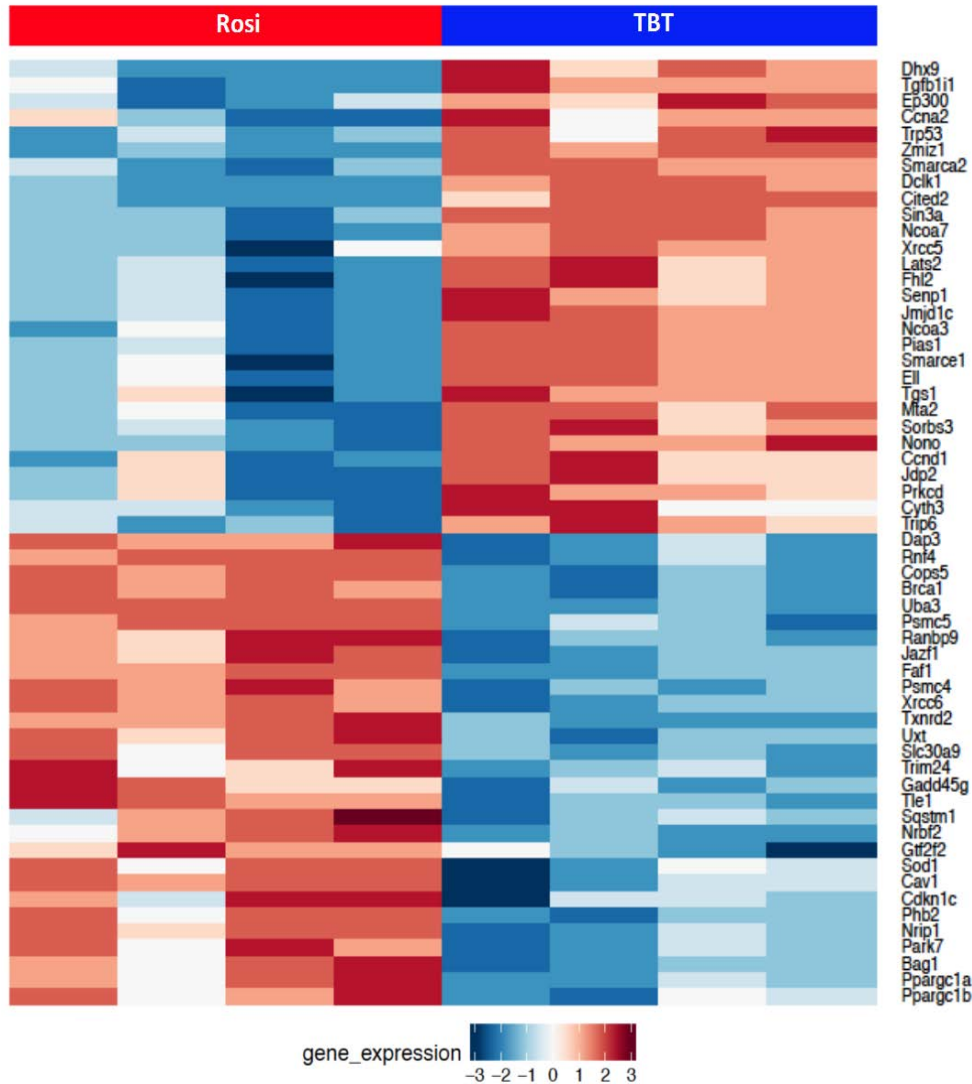

**Figure S2 – Differential expression of nuclear receptor coregulators by Day 4 of differentiation between Rosi- and TBT-treated BM-MSCs.** Primary bone marrow cells were isolated from female, 8 week old, C57BL/6J mice, plated, and allowed to adhere for 7 days. The medium was replaced with basal medium supplemented with osteogenic additives,  $\beta$ -glycerol phosphate, ascorbate, insulin and dexamethasone. Cultures were treated with Vh (DMSO, 0.1%), rosiglitazone (Rosi, 100 nM) or TBT (80 nM), cultured for 4 days and analyzed for mRNA expression using microarray. The heatmap displays the significant differentially expressed nuclear receptor coregulators ( $fdr < 0.05$ ) of 280 identified mouse nuclear receptors from NURSA between the Rosi- and TBT-treated BM-MSCs.

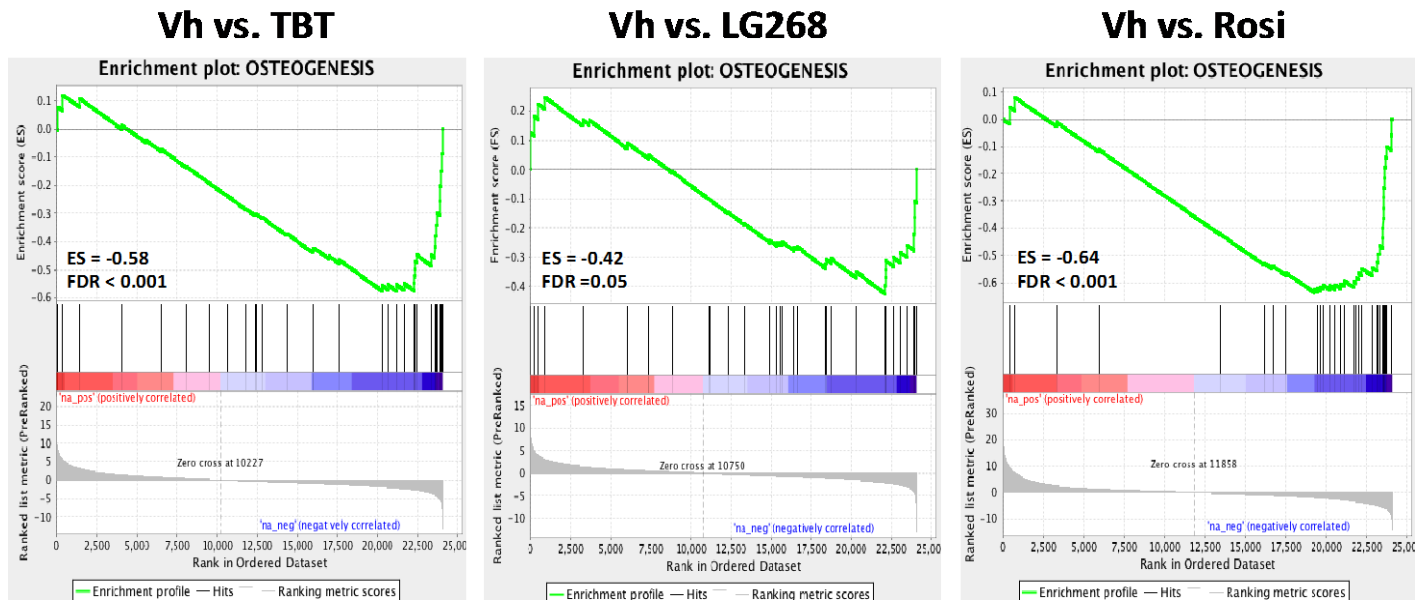

**Figure S3. GSEA plots of enriched osteogenic genes in TBT-, LG100268-, and rosiglitazone-treated BM-MSCs.** Primary bone marrow cells were isolated from female, 8 week old, C57BL/6J mice, plated, and allowed to adhere for 7 days. The medium was replaced with basal medium supplemented with osteogenic additives,  $\beta$ -glycerol phosphate, ascorbate, insulin and dexamethasone. Cultures were treated with Vh (DMSO, 0.1%), rosiglitazone (Rosi, 100 nM), LG100268 (LG268, 100 nM) or TBT (80 nM), cultured for 4 days and analyzed for mRNA expression using microarray. Enrichment analyses were performed for the curated osteogenesis pathway geneset (See Table S2).

**(Attached as Excel File)**

**Figure S4 – Top Gene Ontology (GO) terms enriched for each chemical.** Primary bone marrow cells were isolated from female, 8 week old, C57BL/6J mice, plated, and allowed to adhere for 7 days. The medium was replaced with basal medium supplemented with osteogenic additives,  $\beta$ -glycerol phosphate, ascorbate, insulin and dexamethasone. Cultures were treated with Vh (DMSO, 0.1%), rosiglitazone (Rosi, 100 nM), LG100268 (LG268, 100 nM) or TBT (80 nM), cultured for 4 days and analyzed for mRNA expression using microarray. The heatmap highlights all the different GO Terms enriched by each chemical exposure on differentiated BM-MSCs (red = upregulation; blue = downregulation; significance = q-value<0.1 and q-value<0.05).

**a) Rosiglitazone vs TBT – BM-MSCs**

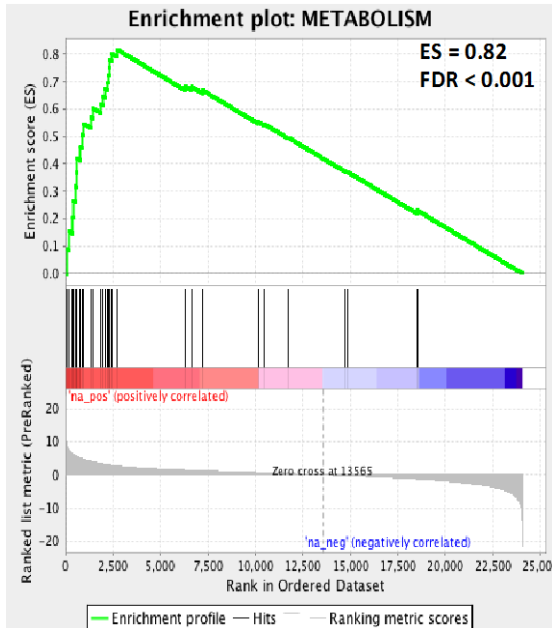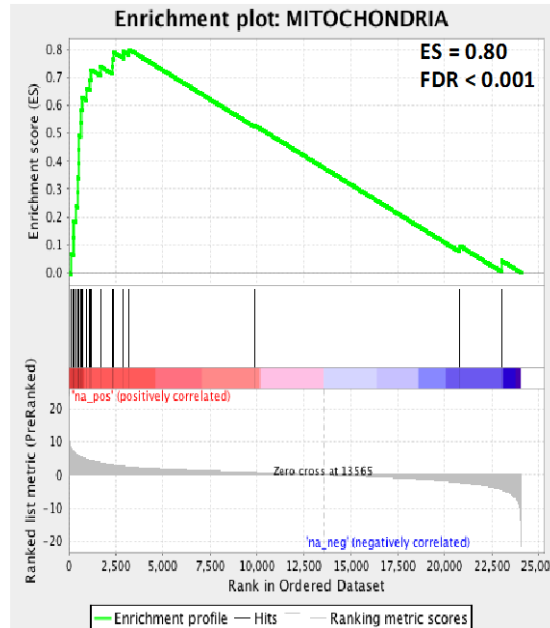

**b) Rosiglitazone vs TBT – 3T3 L1 cells**

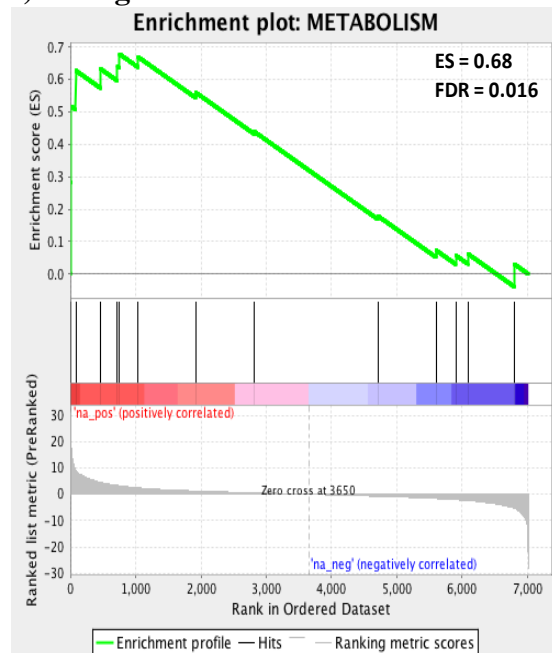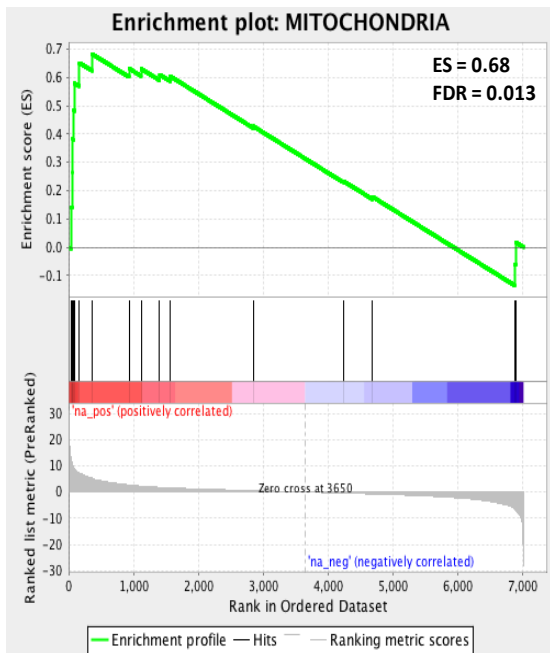

**Figure S5. GSEA plots of rosiglitazone- versus TBT- enriched metabolism- and mitochondria-related gene sets (a) in BM-MSCs and (b) in 3T3 L1 cells.** Primary bone marrow cells were isolated, differentiated and treated as described in Figure 2. Data for 3T3 L1 cells are from a publicly available data set (GSE53004). Enrichment analyses were performed for the curated metabolism and mitochondria pathway genesets (see Table S2).



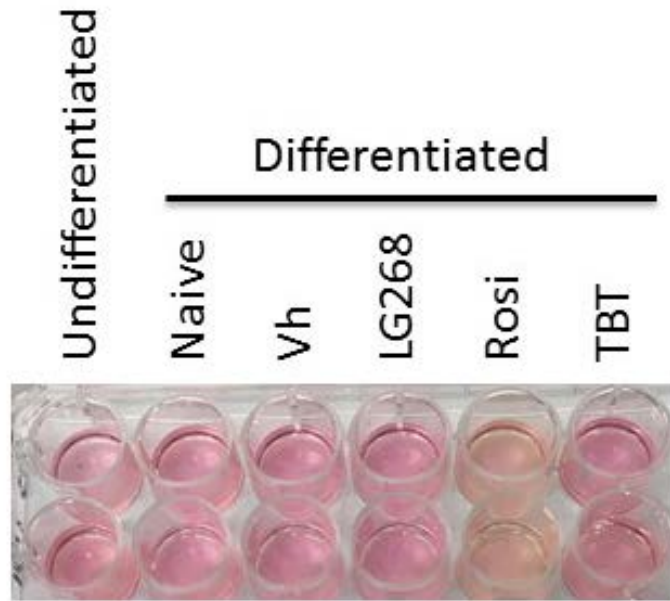

**Figure S6. 3T3 L1 cells cultured with LG268, Rosi and TBT during differentiation.** Cells were plated and then incubated for 4 days. Differentiation and dosing were carried out as described in Figure 6. Pictures were taken prior to mitochondrial biogenesis/activity analyses. Representative image.

## References

- Calderon-Dominguez M, Sebastián D, Fucho R, Weber M, Mir JF, García-Casarrubios E, et al. 2016. Carnitine Palmitoyltransferase 1 Increases Lipolysis, UCP1 Protein Expression and Mitochondrial Activity in Brown Adipocytes. *PloS One* 11:e0159399; doi:10.1371/journal.pone.0159399.
- Cappellen D, Luong-Nguyen N-H, Bongiovanni S, Grenet O, Wanke C, Susa M. 2002. Transcriptional program of mouse osteoclast differentiation governed by the macrophage colony-stimulating factor and the ligand for the receptor activator of NFkappa B. *J. Biol. Chem.* 277:21971–21982; doi:10.1074/jbc.M200434200.
- Gburcik V, Cawthorn WP, Nedergaard J, Timmons JA, Cannon B. 2012. An essential role for Tbx15 in the differentiation of brown and “brite” but not white adipocytes. *Am. J. Physiol. Endocrinol. Metab.* 303:E1053–1060; doi:10.1152/ajpendo.00104.2012.
- Harms M, Seale P. 2013. Brown and beige fat: development, function and therapeutic potential. *Nat. Med.* 19:1252–1263; doi:10.1038/nm.3361.
- Hilton C, Karpe F, Pinnick KE. 2015. Role of developmental transcription factors in white, brown and beige adipose tissues. *Biochim. Biophys. Acta* 1851:686–696; doi:10.1016/j.bbailip.2015.02.003.
- Ji X, Chen D, Xu C, Harris SE, Mundy GR, Yoneda T. 2000. Patterns of gene expression associated with BMP-2-induced osteoblast and adipocyte differentiation of mesenchymal progenitor cell 3T3-F442A. *J. Bone Miner. Metab.* 18: 132–139.
- Kajimura S, Seale P, Tomaru T, Erdjument-Bromage H, Cooper MP, Ruas JL, et al. 2008. Regulation of the brown and white fat gene programs through a PRDM16/CtBP transcriptional complex. *Genes Dev.* 22:1397–1409; doi:10.1101/gad.1666108.
- Krings A, Rahman S, Huang S, Lu Y, Czernik PJ, Lecka-Czernik B. 2012. Bone marrow fat has brown adipose tissue characteristics, which are attenuated with aging and diabetes. *Bone* 50:546–552; doi:10.1016/j.bone.2011.06.016.
- Lo KA, Sun L. 2013. Turning WAT into BAT: a review on regulators controlling the browning of white adipocytes. *Biosci. Rep.* 33; doi:10.1042/BSR20130046.
- Murholm M, Dixen K, Qvortrup K, Hansen LHL, Amri E-Z, Madsen L, et al. 2009. Dynamic regulation of genes involved in mitochondrial DNA replication and transcription during mouse brown fat cell differentiation and recruitment. *PloS One* 4:e8458; doi:10.1371/journal.pone.0008458.
- Rosell M, Kaforou M, Frontini A, Okolo A, Chan Y-W, Nikolopoulou E, et al. 2014. Brown and white adipose tissues: intrinsic differences in gene expression and response to cold exposure in mice. *Am. J. Physiol. Endocrinol. Metab.* 306:E945–964; doi:10.1152/ajpendo.00473.2013.

- Saeed H, Iqtedar M. 2015. Aberrant gene expression profiles, during in vitro osteoblast differentiation, of telomerase deficient mouse bone marrow stromal stem cells (mBMSCs). *J. Biomed. Sci.* 22:11; doi:10.1186/s12929-015-0116-4.
- Schilling AF, Schinke T, Münch C, Gebauer M, Niemeier A, Priemel M, et al. 2005. Increased bone formation in mice lacking apolipoprotein E. *J. Bone Miner. Res. Off. J. Am. Soc. Bone Miner. Res.* 20:274–282; doi:10.1359/JBMR.041101.
- Spoto B, Di Betta E, Mattace-Raso F, Sijbrands E, Vilarde A, Parlongo RM, et al. 2014. Pro- and anti-inflammatory cytokine gene expression in subcutaneous and visceral fat in severe obesity. *Nutr. Metab. Cardiovasc. Dis. NMCD* 24:1137–1143; doi:10.1016/j.numecd.2014.04.017.
- Wang P, Renes J, Bouwman F, Bunschoten A, Mariman E, Keijer J. 2007. Absence of an adipogenic effect of rosiglitazone on mature 3T3-L1 adipocytes: increase of lipid catabolism and reduction of adipokine expression. *Diabetologia* 50:654–665; doi:10.1007/s00125-006-0565-0.
- Xiao Y, Cui J, Li Y-X, Shi Y-H, Le G-W. 2010. Expression of genes associated with bone resorption is increased and bone formation is decreased in mice fed a high-fat diet. *Lipids* 45:345–355; doi:10.1007/s11745-010-3397-0.
- Xiao Y, Cui J, Shi Y, Le G. 2011. Lipoic acid increases the expression of genes involved in bone formation in mice fed a high-fat diet. *Nutr. Res. N. Y. N* 31:309–317; doi:10.1016/j.nutres.2011.03.013.
- Yao W, Cheng Z, Busse C, Pham A, Nakamura MC, Lane NE. 2008. Glucocorticoid excess in mice results in early activation of osteoclastogenesis and adipogenesis and prolonged suppression of osteogenesis: a longitudinal study of gene expression in bone tissue from glucocorticoid-treated mice. *Arthritis Rheum.* 58:1674–1686; doi:10.1002/art.23454.
